# Supplementary material for: Resistance of SARS-CoV-2 Omicron BA.1 and BA.2 Variants to Vaccine-Elicited Sera and Therapeutic Monoclonal Antibodies
Source: MDPI journal article supplement (doi:10.3390/v14061334), 2022-06-18
Supplement: s1 [file s1]

**Table S1. Neutralizing titers of sera from BNT162b2 vaccinated individuals.** (IC50 of BNT162b2 elicited antibodies against viruses with D614G, BA.1 and BA.2 spike proteins. Sera were collected from COVID-19 unexperienced and experienced donors. Age, Sex and Comorbidities are shown.

| BNT162b2-COVID-19 unexperienced |        |     |                                  |                    |                      |                    |                      |                    |                      |
|---------------------------------|--------|-----|----------------------------------|--------------------|----------------------|--------------------|----------------------|--------------------|----------------------|
|                                 |        |     |                                  | D614G              |                      | BA.1               |                      | BA.2               |                      |
| Donor                           | Age    | Sex | Comorbidities                    | 1 month post vax-2 | 1 month post booster | 1 month post vax-2 | 1 month post booster | 1 month post vax-2 | 1 month post booster |
| 1                               | 34     | M   | None                             | 1340               | 4004                 | 76                 | 453                  | 19                 | 327                  |
| 2                               | 29     | F   | None                             | 681                | 3121                 | 14                 | 321                  | 5                  | 239                  |
| 3                               | 37     | F   | Allergy                          | 1063               | 6162                 | 60                 | 678                  | 64                 | 319                  |
| 4                               | 62     | M   | Hypertension, Hyperlipidemia     | 737                | 3698                 | 52                 | 450                  | 4                  | 429                  |
| 5                               | 52     | F   | Hypertension                     | 696                | 3175                 | 39                 | 703                  | 125                | 141                  |
| 6                               | 34     | M   | Hypothyroidism                   | 971                | 6192                 | 1                  | 188                  | 1                  | 55                   |
| 7                               | 38     | F   | Asthma, Anemia, Tinea versicolor | 937                | 5419                 | 1                  | 467                  | 1                  | 725                  |
| 8                               | 38     | M   | None                             | 449                | 1854                 | 66                 | 316                  | 52                 | 232                  |
| 9                               | 52     | F   | None                             | 517                | 6175                 | 90                 | 387                  | 49                 | 266                  |
| Mean (SD)                       | 41 (9) |     |                                  | 821 (282)          | 4422 (1611)          | 44 (33)            | 440 (167)            | 36 (42)            | 303 (191)            |

| BNT162b2-COVID-19 experienced |         |     |                          |                    |                      |                    |                      |                    |                      |
|-------------------------------|---------|-----|--------------------------|--------------------|----------------------|--------------------|----------------------|--------------------|----------------------|
|                               |         |     |                          | D614G              |                      | BA.1               |                      | BA.2               |                      |
| Donor                         | Age     | Sex | Comorbidities            | 1 month post vax-2 | 1 month post booster | 1 month post vax-2 | 1 month post booster | 1 month post vax-2 | 1 month post booster |
| 1                             | 45      | M   | Asthma                   | 5425               | 10443                | 250                | 1695                 | 187                | 1456                 |
| 2                             | 37      | F   | None                     | 9572               | 8991                 | 301                | 1389                 | 249                | 517                  |
| 3                             | 54      | F   | Hypertension, Obesity    | 9880               | 10453                | 213                | 1012                 | 268                | 729                  |
| 4                             | 54      | M   | Cardiovascular disease   | 4419               | 7811                 | 243                | 1566                 | 87                 | 1455                 |
| 5                             | 25      | F   | None                     | 9158               | 10831                | 52                 | 329                  | 188                | 691                  |
| 6                             | 42      | F   | Diabetes, Herpes simplex | 9186               | 9331                 | 359                | 1364                 | 182                | 712                  |
| 7                             | 43      | M   | None                     | 7834               | 13891                | 300                | 334                  | 207                | 346                  |
| Mean (SD)                     | 43 (10) |     |                          | 7925 (2168)        | 10250 (1917)         | 245 (98)           | 1098 (565)           | 195 (58)           | 844 (439)            |
